# Supplementary material
Source: bioRxiv or medRxiv preprint supplement (https://www.biorxiv.org/highwire/filestream/129424/field_highwire_adjunct_files/0/430918-1.pdf)
Supplement: Supplementary file [file 430918-1.pdf]

## Supplementary Tables

**Table S1.** gRNA-sites used in this study.

| Target within <i>FAS2</i> | Sequence encoding gRNA (20 bp) | Target ID (CRISPy) |
|---------------------------|--------------------------------|--------------------|
| K83                       | CAGCTAGTTCGGATGGATCT           | 649518             |
| K173                      | ACAATCAAAGACTTGGTCGG           | 623380             |
| K1551                     | ATTCCACGGTACATCCACAA           | 623611             |

**Table S2.** PCR-primers used in this study.

|                     |                                                                     |
|---------------------|---------------------------------------------------------------------|
| <b>F-gRNA-HR</b>    | TAGGCGTATCACGAGATCGCGTCAGCTGAAGCTTCTCTTTGAAAAGATAATGTA<br>TGATTATGC |
| <b>R-gRNA-HR</b>    | ATACGAAGTTATATTAAGGGTTGTGCGACCTGCAGCAGACATAAAAAACAAAA<br>AAGCACC    |
| <b>F-gRNA-K83</b>   | CAGCTAGTTCGGATGGATCTGTTTTAGAGCTAGAAATAGCAAG                         |
| <b>R-gRNA-K83</b>   | AGATCCATCCGAACTAGCTGGATCATTTATCTTTCACTGCGGA                         |
| <b>F-gRNA-K173</b>  | ACAATCAAAGACTTGGTCGGGTTTTAGAGCTAGAAATAGCAAG                         |
| <b>R-gRNA-K173</b>  | CCGACCAAGTCTTTGATTGTGATCATTATCTTTCACTGCGGA                          |
| <b>F-gRNA-K1551</b> | ATTCCACGGTACATCCACAAGTTTTAGAGCTAGAAATAGCAAG                         |
| <b>R-gRNA-K1551</b> | TTGTGGATGTACCGTGAATGATCATTATCTTTCACTGCGGA                           |

**Table S3.** Repair-oligonucleotides used in study.<sup>1</sup>

|                    |                                                                                               |
|--------------------|-----------------------------------------------------------------------------------------------|
| <b>F-K83-Gln</b>   | CATAGAGAAATCTTATGCTATTCG <b>CAAG</b> ATGCCAAAGAGATTTATTATACTCCAGAT<br>CCATCCGAACTAGCTGCAAAGGA |
| <b>R-K83-Gln</b>   | TCCTTTGCAGCTAGTTCGGATGGATCTGGAGTATAATAAATCTCTTTGGCATC <b>TTGCG</b><br>AATAGCATAAGATTTCTCTATG  |
| <b>F-K83-Arg</b>   | CATAGAGAAATCTTATGCTATTCG <b>CGG</b> ATGCCAAAGAGATTTATTATACTCCAGAT<br>CCATCCGAACTAGCTGCAAAGGA  |
| <b>R-K83-Arg</b>   | TCCTTTGCAGCTAGTTCGGATGGATCTGGAGTATAATAAATCTCTTTGGCATC <b>CCGC</b><br>GAATAGCATAAGATTTCTCTATG  |
| <b>F-K173-Gln</b>  | TCCATTCCAATGTCCAAGACAATC <b>CAGGAC</b> CTAGTGGGTGGTAAATCTACAGTCCAA<br>AAT                     |
| <b>R-173-Gln</b>   | ATTTTGGACTGTAGATTTACCACCCACTAGGTC <b>CTGG</b> ATTGTCTTGGACATTGGAAT<br>GGA                     |
| <b>F-K173-Arg</b>  | TCCATTCCAATGTCCAAGACAATC <b>CGAGAC</b> CTAGTGGGTGGTAAATCTACAGTCCAA<br>AAT                     |
| <b>R-K173-Arg</b>  | ATTTTGGACTGTAGATTTACCACCCACTAGGTC <b>TCGG</b> ATTGTCTTGGACATTGGAAT<br>GGA                     |
| <b>F-K1551-Gln</b> | GTGTCGCTTCATTCCACGGTACATCCACTAAAGCTAATGAC <b>CAA</b> AACGAATCTGCCA<br>CAATTAATGAAAT           |
| <b>R-K1551-Gln</b> | ATTCATTAATTGTGGCAGATTCGTT <b>TTGG</b> TCATTAGCTTTAGTGGATGTACCGTGGA<br>ATGAAGCGACAC            |
| <b>F-K1551-Arg</b> | GTGTCGCTTCATTCCACGGTACATCCACTAAAGCTAATGAC <b>CGG</b> AACGAATCTGCCA<br>CAATTAATGAAAT           |
| <b>R-K1551-Arg</b> | ATTCATTAATTGTGGCAGATTCGTT <b>CCGG</b> TCATTAGCTTTAGTGGATGTACCGTGGA<br>ATGAAGCGACAC            |

<sup>1</sup> Red color indicates where modifications are introduced to alter sites K83/K173/K1551, green color indicates where modifications are introduced to alter PAM/gRNA-site.

**Table S4.** Fold change difference in degree of acetylation detected in mutants (*sir2* $\Delta$ , *snf1* $\Delta$ , *gcn5* $\Delta$ , *sir2* $\Delta$ *snf1* $\Delta$ , *sir2* $\Delta$ *gcn5* $\Delta$ , *snf1* $\Delta$ *sir2* $\Delta$ ) compared to the control strain.<sup>1</sup>

|                 | <i>sir2</i> $\Delta$ | <i>snf1</i> $\Delta$ | <i>gcn5</i> $\Delta$ | <i>sir2</i> $\Delta$ <i>snf1</i> $\Delta$ | <i>sir2</i> $\Delta$ <i>gcn5</i> $\Delta$ | <i>snf1</i> $\Delta$ <i>gcn5</i> $\Delta$ |
|-----------------|----------------------|----------------------|----------------------|-------------------------------------------|-------------------------------------------|-------------------------------------------|
| <b>K1551(1)</b> |                      |                      | 1.62                 | -2.3                                      | -2.92                                     |                                           |
| <b>K1551(2)</b> | -3.01                | -3.46                | 0.95                 | -2.4                                      |                                           |                                           |
| <b>K1551(3)</b> | -2.44                | -2.18                | 1.31                 | -1.79                                     | -3                                        | -2.05                                     |
| <b>K173</b>     | -3.46                | -3.4                 | 0.06                 | -2.78                                     | -3.96                                     | -3.47                                     |
| <b>K83</b>      |                      |                      | 0.73                 | -1.91                                     |                                           |                                           |

*K1551(1)*      *ANDK(Acetyl)NESATINEM(Oxidation)M(Oxidation)K*

*K1551(2)*      *ANDK(Acetyl)NESATINEMM(Oxidation)K*

*K1551(3)*      *ANDK(Acetyl)NESATINEMMK*

*K173*          *TIK(Acetyl)DLVGGK*

*K83*          *EILCYSK(Acetyl)DAK*

<sup>1</sup>Samples were harvested in glucose-limited chemostats, with the exception of “Batch”, which indicates the degree of acetylation difference between the control strain in glucose-limitation to unlimited glucose conditions (Batch). Detected peptide sequences are indicated below the table. (Kumar et al., unpublished).
